# Supplementary material for: Revealing the Potential Markers of N(4)-Acetylcytidine through acRIP-seq in Triple-Negative Breast Cancer
Source: MDPI journal article supplement (doi:10.3390/genes13122400), 2022-12-18

Supplementary Figure S1

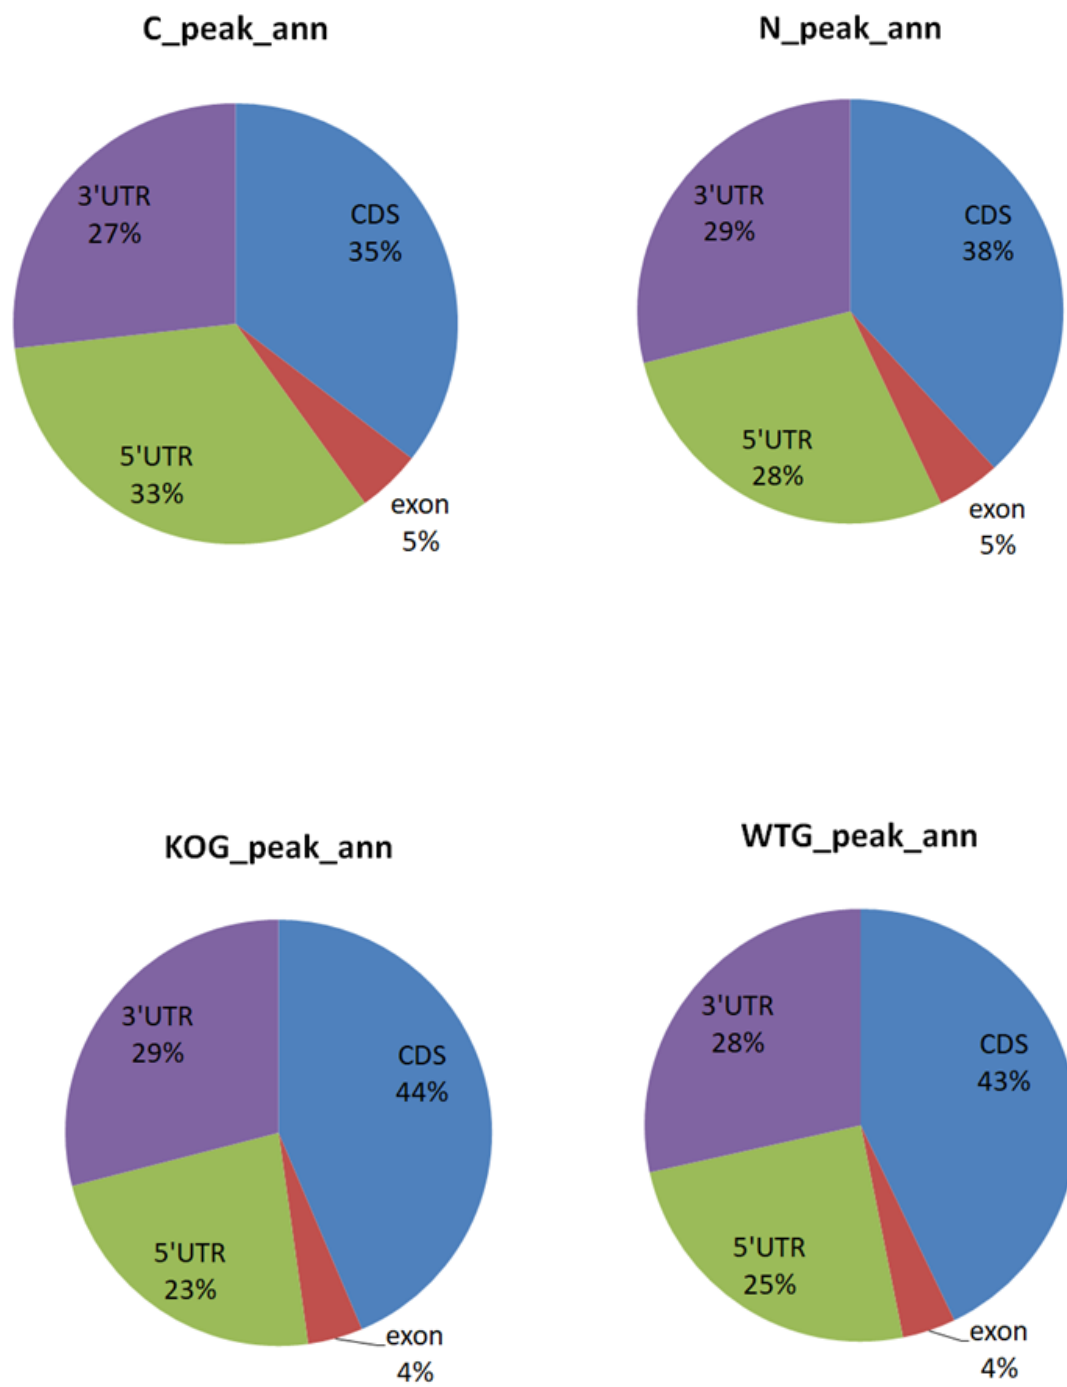

Supplementary Figure S2

## Motif Results

A

Caner\_homer

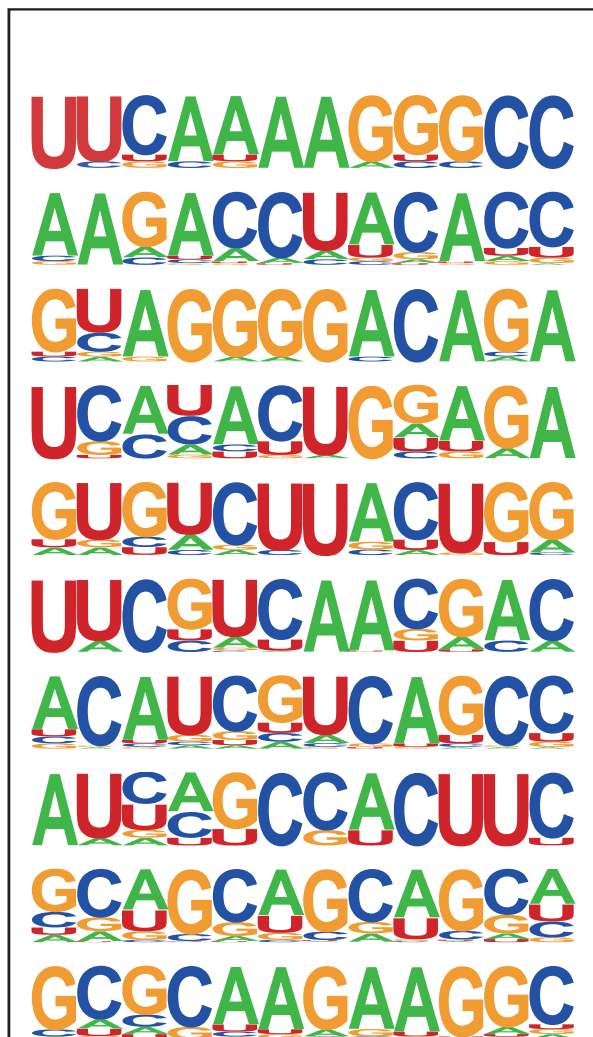

B

WTG\_homer

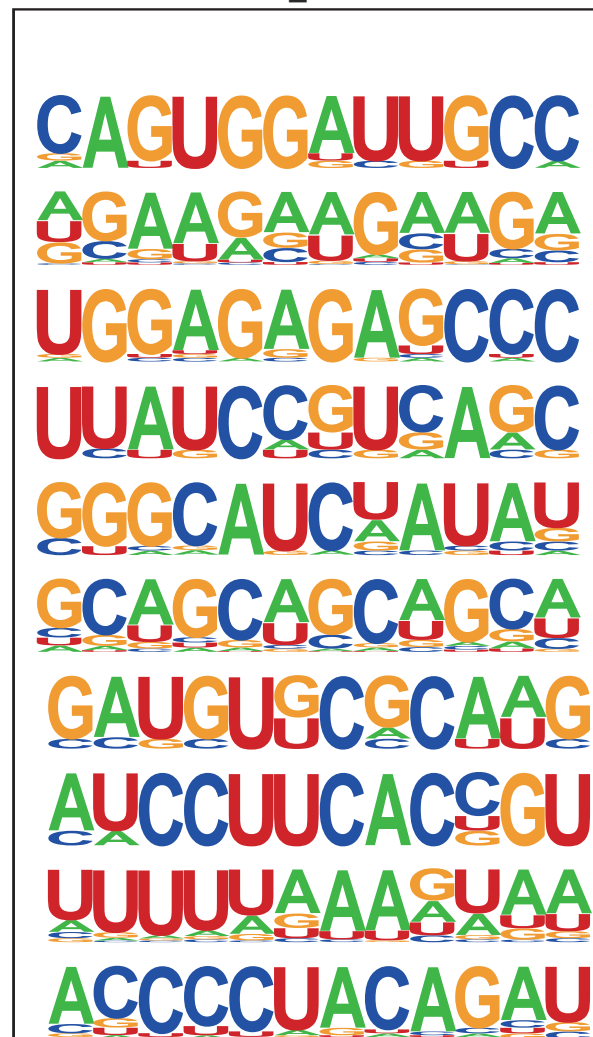

Supplementary Figure S3

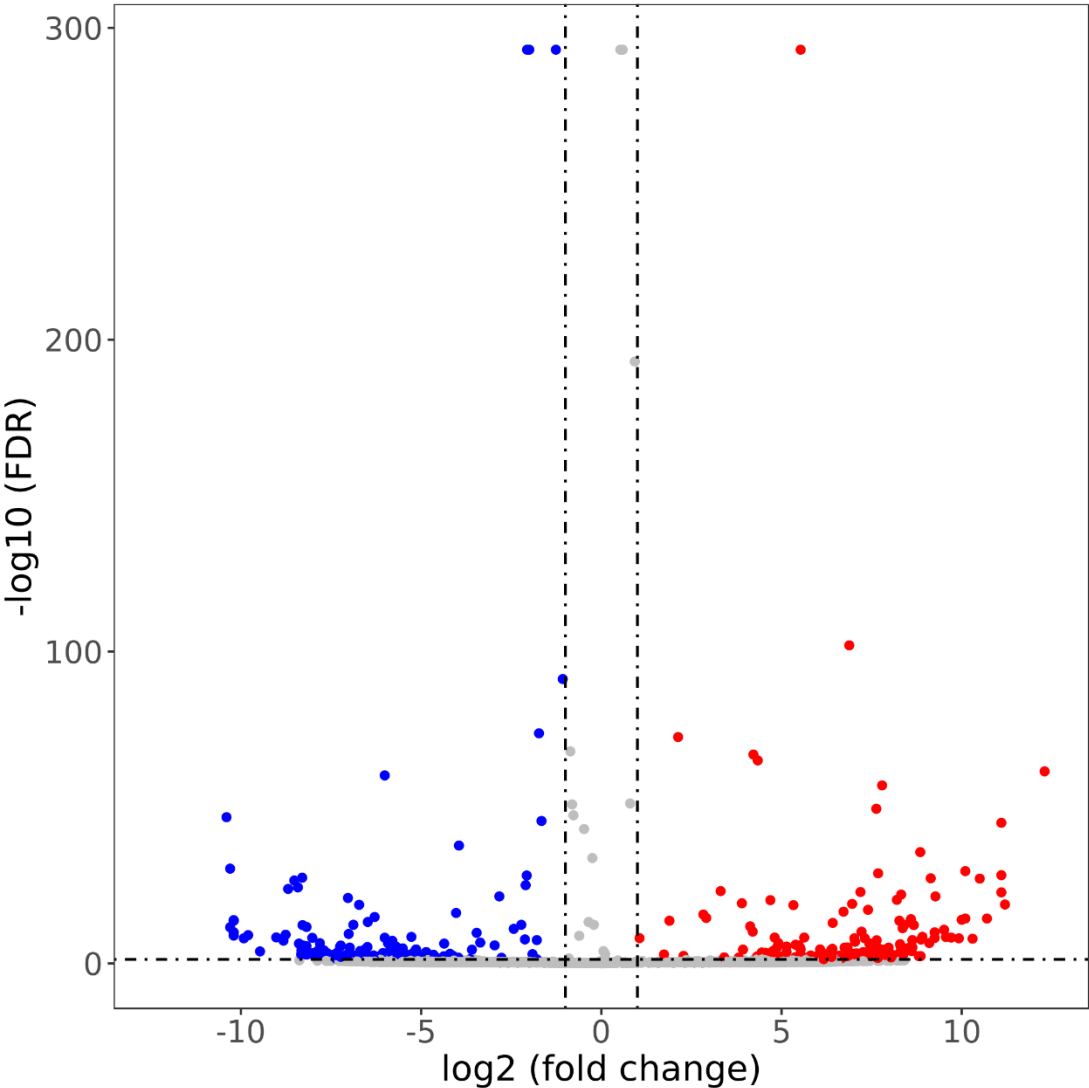

Supplementary Figure S4

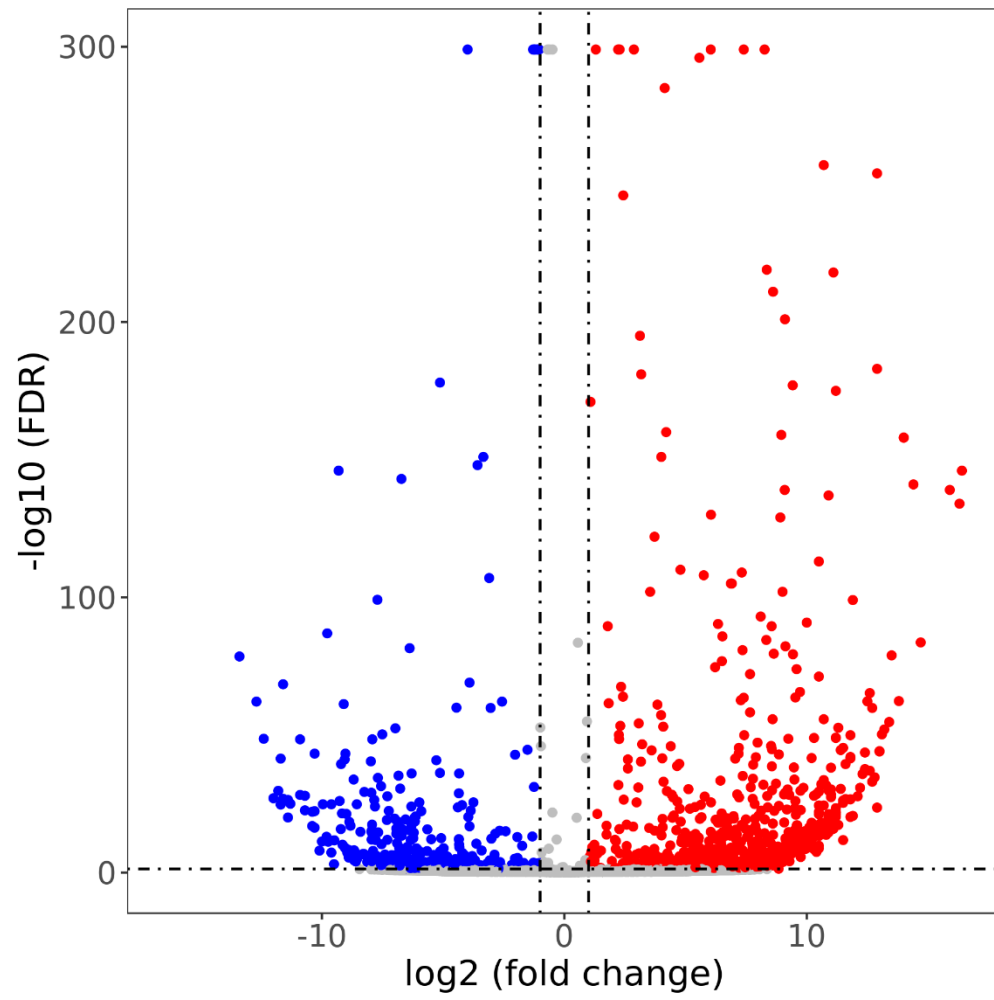

Supplementary Figure S5

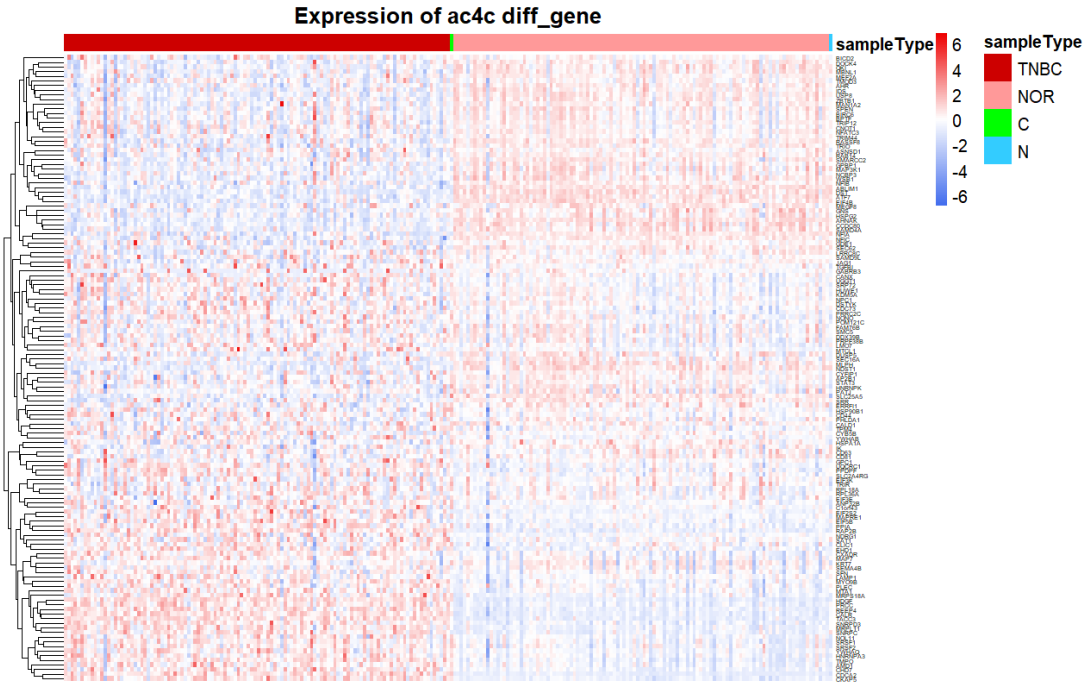

Supplementary Figure S6

A

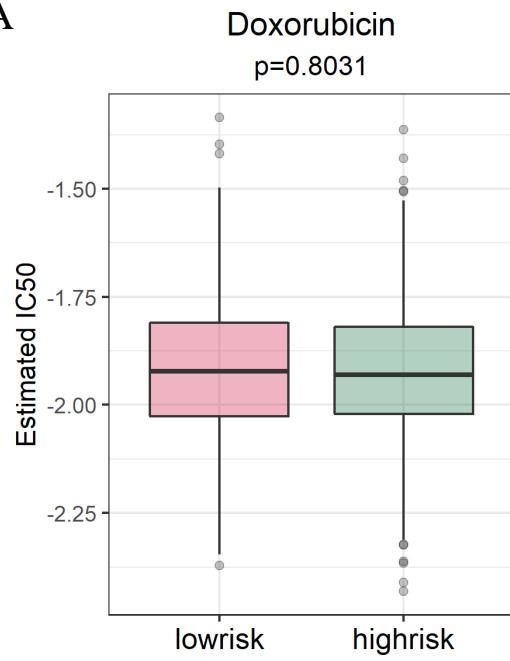

B

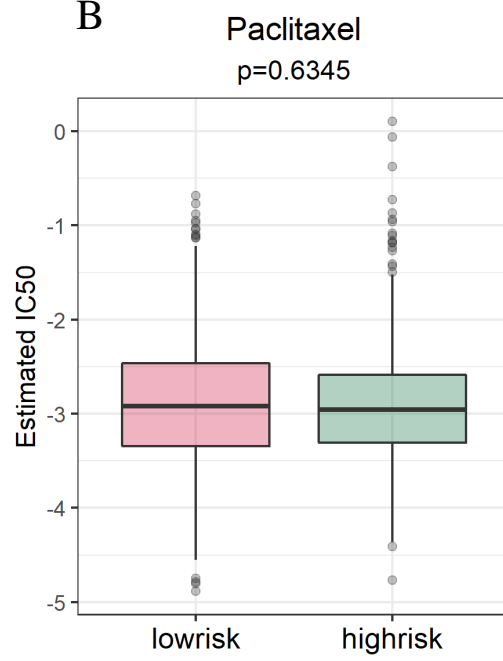

## Supplementary Figure S7

A Measured Vs. C.V. predicted phenotype

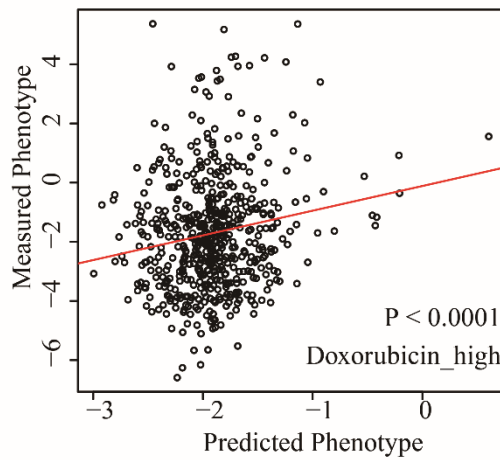

B Measured Vs. C.V. predicted phenotype

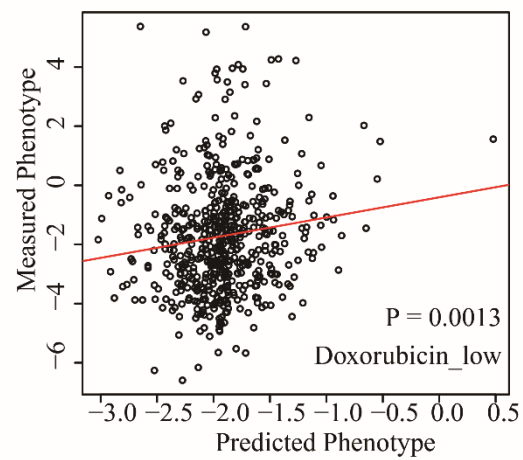

C Measured Vs. C.V. predicted phenotype

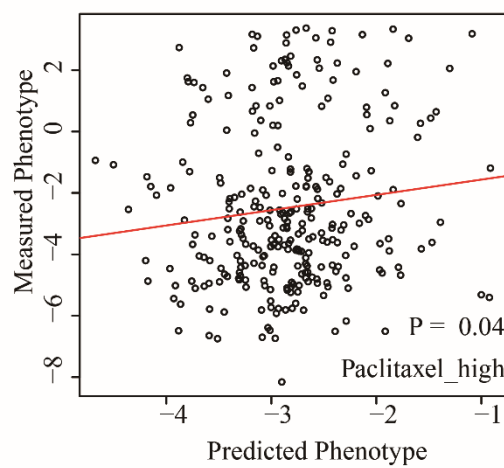

D Measured Vs. C.V. predicted phenotype

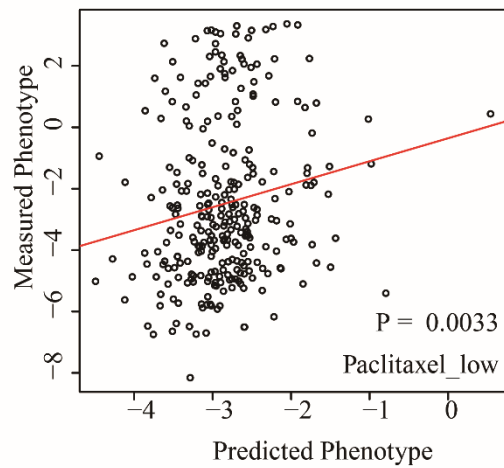

Supplement: s1 [file s1]
